# Supplementary material
Source: publisher figshare collection journal article supplement (https://tandf.figshare.com/articles/dataset/_/4001451)
Supplement: Supplementary file 1 [file 1]

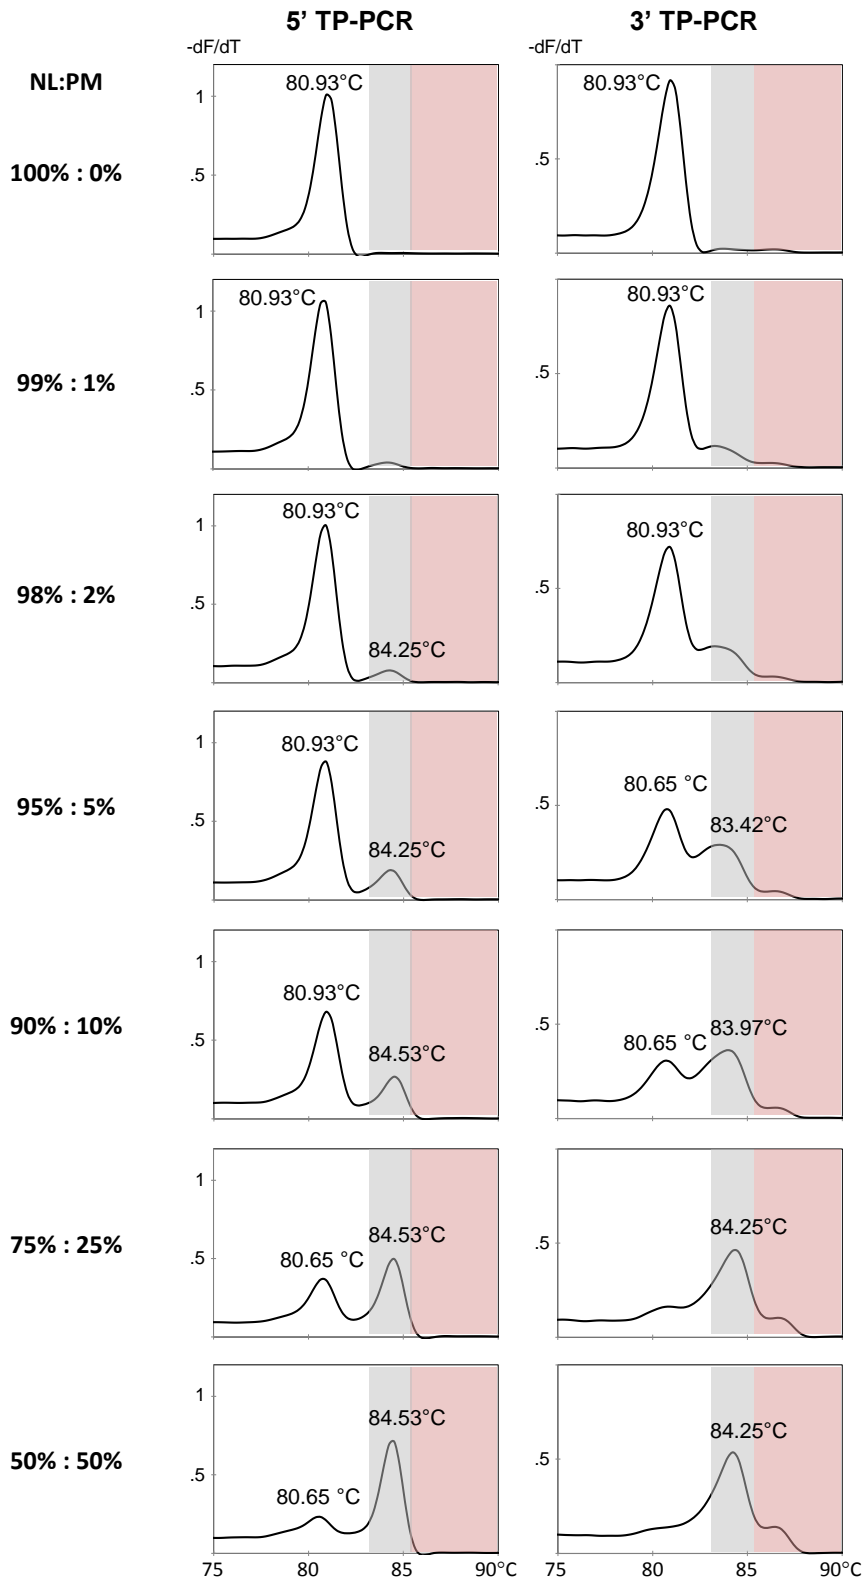

**Supplemental Figure S1.** Melt peaks of 5' and 3' TP-PCR products of non-disease associated, i.e. normal/premutation mixtures. Domains highlighted in grey and pink represent premutation and full penetrance zones, respectively. The presence of premutation allele in the mixture could be detected at 10% in the normal allele background.

-dF/dT, negative first derivative of fluorescence versus temperature; NL, normal; PM, premutation
