# Supplementary material
Source: publisher figshare collection journal article supplement (https://tandf.figshare.com/articles/dataset/_/4001451)
Supplement: Supplementary file 2 [file 1]

**Table S1.** Repeat size and melt peak temperatures of clinical samples carrying expanded alleles

| Sample ID                | Repeat size <sup>a</sup> | T <sub>m</sub> (°C) |           |
|--------------------------|--------------------------|---------------------|-----------|
|                          |                          | 5' TP-PCR           | 3' TP-PCR |
| pDMPK(CTG) <sub>35</sub> | 35 <sup>b</sup>          | 83.97               | 83.42     |
| pDMPK(CTG) <sub>48</sub> | 48 <sup>b</sup>          | 84.79               | 84.51     |
| DM0001                   | 5 / 160                  | 86.74               | 86.46     |
| DM0002                   | 13 / 150                 | 86.74               | 86.73     |
| DM0006                   | 11 / 300-700             | 87.02               | 86.73     |
| DM0010                   | 13 / 400-480             | 87.3                | 86.73     |
| DM0011                   | 5 / 80                   | 85.36               | 85.63     |
| DM0014                   | 10 / 1200-1500           | 87.02               | 86.73     |
| DM0017                   | 12 / 1000-1500           | 87.02               | 86.73     |
| DM0024                   | 5 / 1200-1600            | 87.02               | 86.73     |
| DM0025                   | 200 - >1000              | 87.02               | 86.73     |
| DM0027                   | 12 / 800-1150            | 87.02               | 87.01     |
| DM0031                   | 13 / 550-1200            | 86.74               | 86.73     |
| DM0032                   | 14 / 400-650             | 87.02               | 86.73     |
| DM0037                   | 8 / 550-900              | 87.02               | 87.01     |
| DM0038                   | 10 / 200-500             | 87.3                | 87.29     |
| DM0039                   | 5 / 550-1050             | 87.02               | 86.73     |
| DM0043                   | 5 / 1250-1900            | 87.02               | 86.73     |
| DM0044                   | 5 / 290-750              | 87.02               | 86.73     |
| DM0045                   | 5 / 3000-4000            | 87.02               | 86.73     |
| DM0047                   | 11 / 1900-2600           | 87.02               | 86.73     |
| DM0049                   | 5 / 300-600              | 86.74               | 86.73     |
| DM0051                   | 5 / 400-600              | 87.02               | 87.01     |
| DM0052                   | 5 / 500-700              | 87.02               | 87.01     |
| DM0054                   | 14 / 350-700             | 87.02               | 86.73     |
| DM0058                   | 13 / 450-600             | 87.3                | 86.73     |
| DM0060                   | 11 / 650-950             | 87.02               | 86.73     |

<sup>a</sup>As previously genotyped using PCR (for the non-disease associated allele) and Southern blot analysis (for the expanded allele)

<sup>b</sup>Repeat-length determined by sequencing
